# Supplementary material
Source: Springer Nature journal article supplement (https://www.springermedizin.de/resource/supplementary/12961_2013_287_MOESM3_ESM.pdf/9570966)
Supplement: MOESM3 [file 9570966]

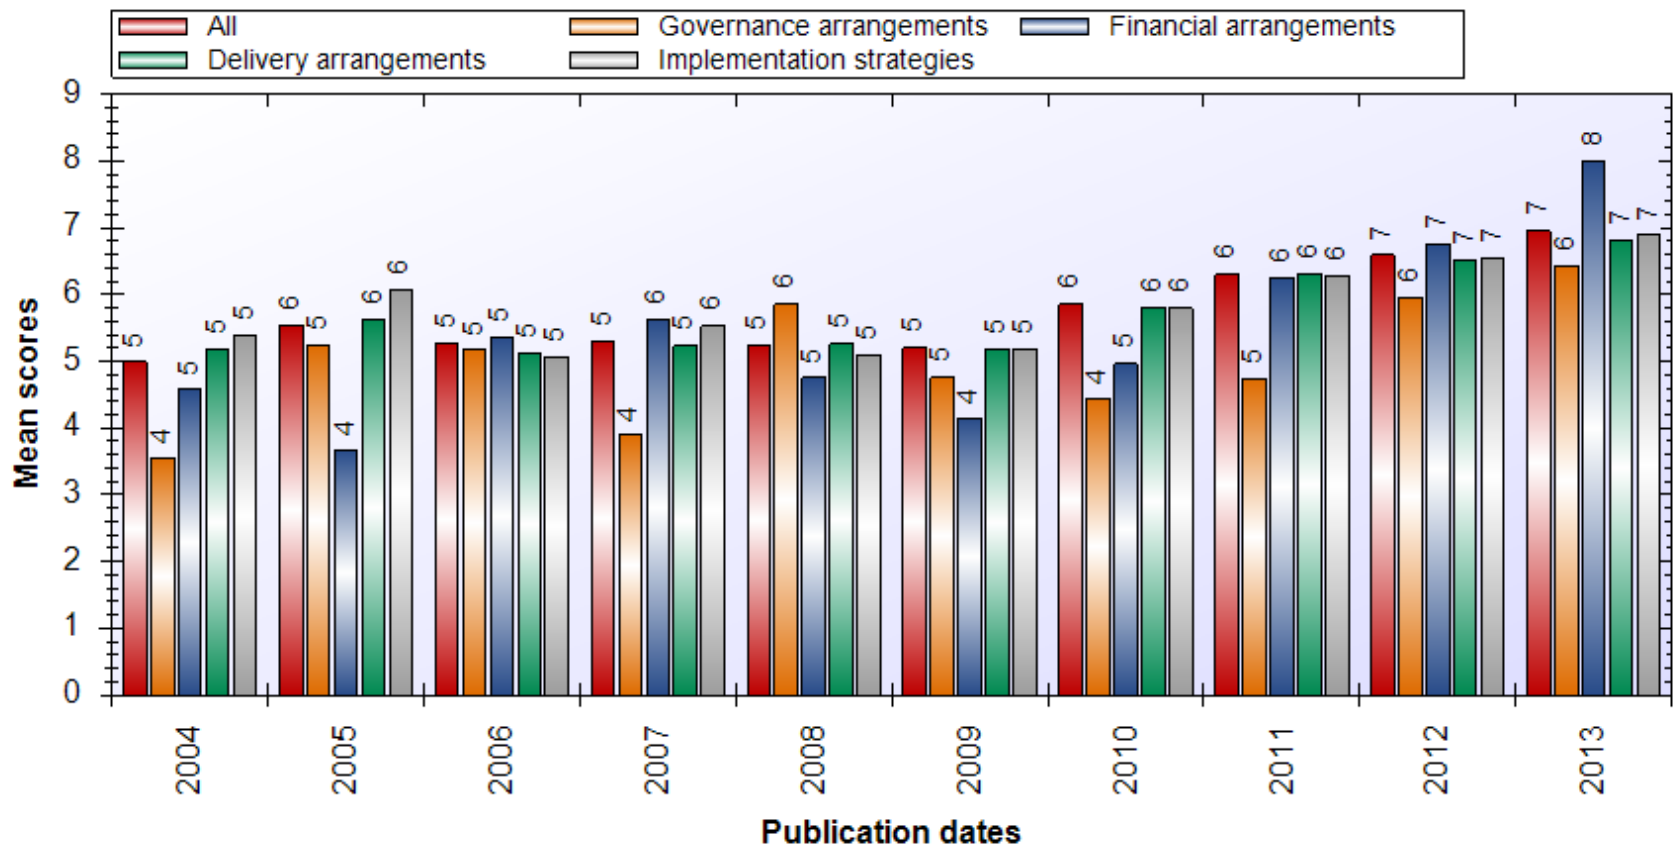

\* Due to the fact that the denominators for quality appraisal scores can vary using the AMSTAR tool when a question is deemed to be 'Not applicable', we standardized the mean quality score by: 1) converting each score into a percentage, 2) calculating the average of the percentage scores for each cell of the table, and 3) using the average percentage score to calculate the mean score out of 11.
